# Supplementary material for: The transcription factor LAG-1/CSL plays a Notch-independent role in controlling terminal differentiation, fate maintenance, and plasticity of serotonergic chemosensory neurons
Source: PubMed Central journal article supplement (PMC8289040; doi:10.1371/journal.pbio.3001334), 2021-07-07
Supplement: pbio.3001334.s002.pdf [file pbio.3001334.s002.pdf]

**A** Serotonin pathway genes

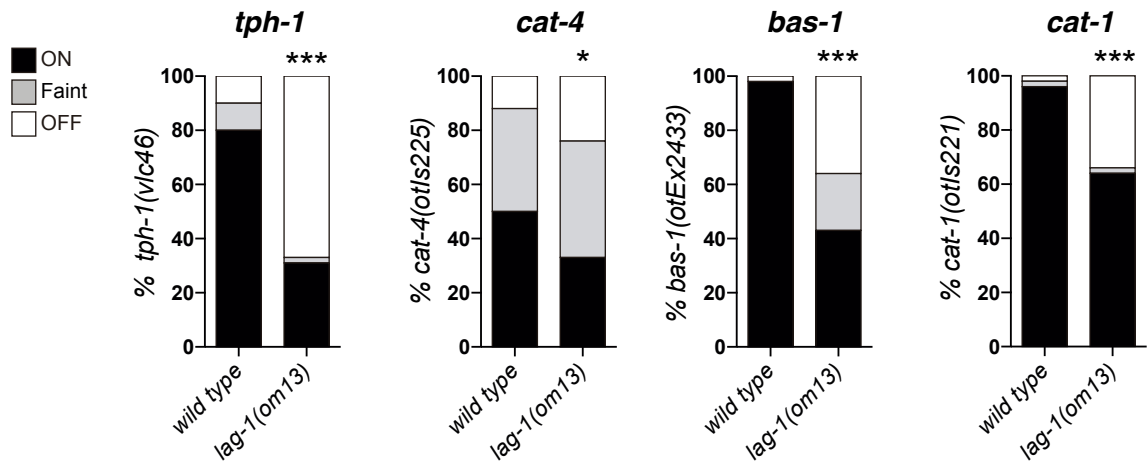

**B** Additional effector genes

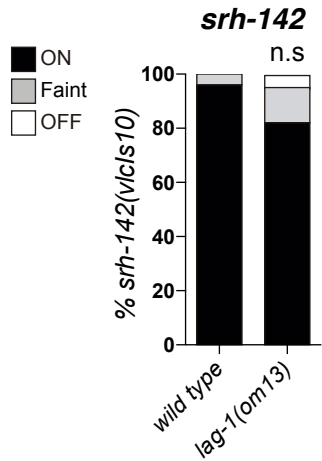

**C** ADF lineage analysis

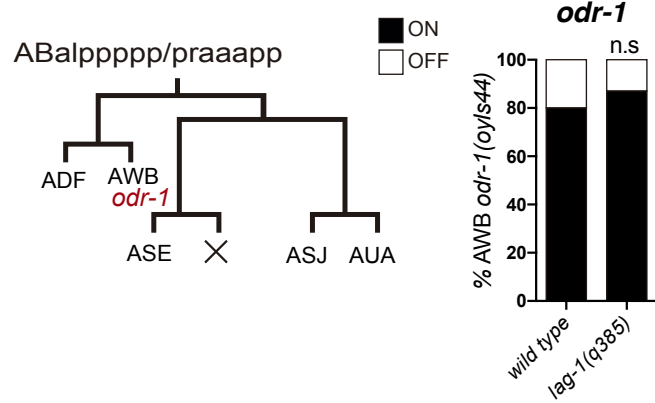

**D** LAG-1 role on serotonin re-uptaker neurons

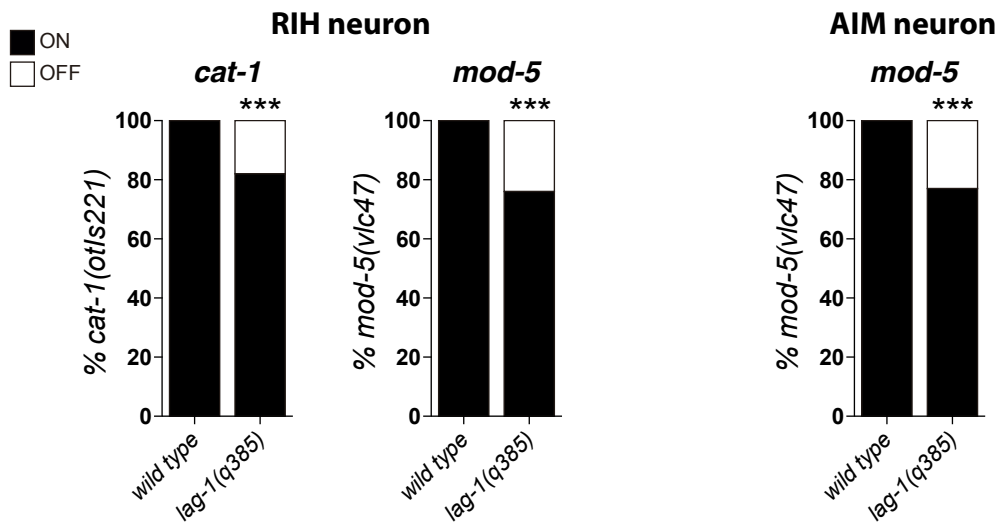

Supplementary Figure 2

**Supplementary Figure 2. *lag-1* mutants show expression defects in ADF serotonergic neuron and RIH and AIM serotonin re-uptaker neurons.**

A) Quantification of *lag-1(om13)* hypomorphic mutant phenotypes shows significant expression defects for serotonin pathway genes. See S1 Data for numerical values.

B) *lag-1(om13)* mutants do not show expression defects in *srh-142(vlc1s10)* effector gene. See S1 Data for numerical values.

C) *lag-1(q385)* ADF lineage analysis. Expression of *odr-1(oyls44)* in AWB, sister cell of ADF, is unaffected in *lag-1(q385)* mutants. See S1 Data for numerical values.

D) *lag-1(q385)* null mutant shows significant expression defects for *mod-5(vlc47)* in RIH and AIM neurons and *cat-1(otls221)* in RIH neuron. See S1 Data for numerical values.
