# Supplementary material for: The transcription factor LAG-1/CSL plays a Notch-independent role in controlling terminal differentiation, fate maintenance, and plasticity of serotonergic chemosensory neurons
Source: PubMed Central journal article supplement (PMC8289040; doi:10.1371/journal.pbio.3001334), 2021-07-07
Supplement: pbio.3001334.s011.pdf [file pbio.3001334.s011.pdf]

### S3 Data. Primers.

#### Primers to genotype mutant strains

| Gene (allele)        | Mutation                                                           | Sequences                                                                                                           |
|----------------------|--------------------------------------------------------------------|---------------------------------------------------------------------------------------------------------------------|
| <i>lag-1(q385)</i>   | G>A substitution<br>Nonsense mutation                              | fwd tgaaagtttggttgagcaacc<br>rev ttcattctggagcgaatcc                                                                |
| <i>lag-1(om13)</i>   | G>A substitution<br>Missense mutation                              | fwd tctctcaacttcacaaatgtgc<br>rev gaacaatgaagactctctcacttc                                                          |
| <i>rff-3(pk1426)</i> | 3015bp deletion                                                    | fwd WT/MUT tccgagttcgcacatcaagttcac<br>rev WT agacgaaatccggcatgatcc<br>rev Mut cactcccgcgtgttcaaattcttc             |
| <i>lim-4(yz12)</i>   | 296bp deletion                                                     | fwd WT tcaaccgggacagtaatccg<br>fwd WT/MUT gcgatcgactattcaggcg<br>rev WT/MUT tccggaattgcatcttccacg                   |
| <i>daf-19(m86)</i>   | G>A substitution<br>Nonsense mutation                              | fwd cagtattcaacaacatgcag<br>rev gaagatacaacatgtttcgg                                                                |
| <i>daf-12(sa204)</i> | G>A substitution<br>Missense mutation                              | fwd gatttggttatttctagcatc<br>rev aacatagcaaattatagggg                                                               |
| <i>lin-12(n941)</i>  | CC>RR substitution<br>Missense mutation                            | fwd ttccaatcgaagatcacaccga<br>rev tgaggaattctctgtgaacagg                                                            |
| <i>glp-1(q46)</i>    | C>T substitution<br>Nonsense mutation                              | fwd caacgaaagtgtatggatcttgcttc<br>rev cctcgtctttcaatacaatgtttccg                                                    |
| <i>sel-8(ok387)</i>  | 979bp deletion                                                     | fwd WT/MUTctgaaaattttgtccacttttctatttcgc<br>rev WT ccatataagccccatatttcagatgc<br>rev WT/MUT aagaaacagtttcgatgacaccc |
| <i>glp-1(e2144)</i>  | C>T substitution<br>Missense mutation                              | fwd ccaataccaagagacactgtagcg<br>rev tgacaacagcctcatgaaggg                                                           |
| <i>unc-43(n498)</i>  | C>T substitution<br>Missense mutation<br>(gain of function allele) | fwd gacaattccacgctgatggc<br>rev ataaaaccacgggcttcgag                                                                |
| <i>dyf-1(yz66)</i>   | 168bp deletion                                                     | fwd ttacctgaaaagcttctcaactgc<br>rev tccattccacaagaaacgttgc                                                          |
| <i>che-11(e1810)</i> | G>A substitution<br>Nonsense mutation                              | fwd gtttgatagctttgagcattcgg<br>rev aatgaagtgtgcagctttggc                                                            |
| <i>tir-1(yz68)</i>   | C>T substitution<br>Missense mutation<br>(gain of function allele) | fwd actgacgtgattgaccatcatcc<br>rev caaccttcgagccattcttcg                                                            |

## Primers for cloning of promoter sequences in pPD95.75

| Cloned region                   | Sequence                                                                                                                                                                                                                                          |
|---------------------------------|---------------------------------------------------------------------------------------------------------------------------------------------------------------------------------------------------------------------------------------------------|
| tph-1prom17                     | fwd gagagactgcagggtcatttattctcc<br>rev gagagaggatccacaatctaataatccggag                                                                                                                                                                            |
| tph-1prom2                      | fwd gagagactgcaggtagtaagctccgatgcgttc<br>rev gagagaggatccatgattgaagagagcaatgctacc                                                                                                                                                                 |
| cat-1prom37                     | fwd gagagaggatccgacatacctcttctccaag<br>rev gagagactgcaggcataaataataatcaaatc                                                                                                                                                                       |
| cat-1prom14                     | fwd gagagaggatccaagacaatttctaacagtagatggg<br>rev gagagactgcagacgtaacgcagtttcttcaag                                                                                                                                                                |
| mod-5prom8                      | fwd gagagactgcagaataaattaattgaattttcaaaacaagtt<br>rev gagagaggatccttatctgatattttctcacctgc                                                                                                                                                         |
| SCAN#1<br>tph-1prom32           | fwd agcttttttttttttttttttacggaaccatgacagcaaaaataatagagtggcgctt<br>attcgactcatttcgtttttttctccggatattagattgt<br>rev ctagaacaatctaataatccggagaaaaaaaaaacgaaatgagtcgaataaggcgc<br>cactctattttttgctgcatggttccgtaaaaaaaaaaaaaaaaaaaaa                   |
| SCAN#2<br>tph-1prom33           | fwd agcttggctcatttattctcccacggttttttttttttttaaatagagtggcgcttattc<br>gactcatttcggttttttttctccggatattagattgt<br>rev ctagaacaatctaataatccggagaaaaaaaaaacgaaatgagtcgaataaggcgc<br>ccactctatttaaaaaaaaaaaaaaaaaaaaaaaaaaacgtgggagaataaatgagcca         |
| SCAN#3<br>tph-1prom34           | fwd agcttggctcatttattctcccacggaaccatgacagcaaaaattttttttttttttt<br>ttcgactcatttcggttttttttctccggatattagattgt<br>rev ctagaacaatctaataatccggagaaaaaaaaaacgaaatgagtcgaaaaaaaaa<br>aaaaaaaaaaaaaaaaattttgctgcatggttccgtaggagaataaatgagcca              |
| SCAN#4<br>tph-1prom35           | fwd agcttggctcatttattctcccacggaaccatgacagcaaaaataatagagtgg<br>cgcttatttttttttttttttttctccggatattagattgt<br>rev ctagaacaatctaataatccggagaaaaaaaaaaaaaaaaaaaaaaaaataaggcgc<br>ccactctattttttgctgcatggttccgtaggagaataaatgagcca                       |
| SCAN#5<br>tph-1prom36           | fwd agcttggctcatttattctcccacggaaccatgacagcaaaaataatagagtgg<br>cgcttatttcgactcatttcggttttttttttttttttttttttttttttttttttttttt<br>rev ctagaaaaaaaaaaaaaaaaaaaaaaaaaaaaaaaaaacgaaatgagtcgaataagg<br>cgccactctattttttgctgcatggttccgtaggagaataaatgagcca |
| SCAN#1+2<br>tph-1prom46<br>(3x) | fwd gagagaaagcttggctcatttattctcccac<br>rev gagagatctagaattttgctgcatggttcc<br><br>3x sequence: ggctcatttattctcccacggaaccatgacagcaaaaatggctcattt<br>attctcccacggaaccatgacagcaaaaat ggctcatttattctcccacggaaccatgac<br>agcaaaaat                      |
| tph-1prom45<br>(1x gcy-5)       | fwd agcttggctcatttattctcccacggaaccatgacagcaaaaata<br>rev agcttattttgctgcatggttccgtaggagaataaatgagcca<br><br>1x sequence: ggctcatttattctcccacggaaccatgacagcaaaaata                                                                                 |

|                                                     |                                                                                                                                                                                                                                                                                                                                         |
|-----------------------------------------------------|-----------------------------------------------------------------------------------------------------------------------------------------------------------------------------------------------------------------------------------------------------------------------------------------------------------------------------------------|
|                                                     | gcy-5 sequence: agctttcattattaagcaaattcaagtataataacaactataaataag<br>accaccaaatttgatatccggattaaaatgtatattttgaatagagaagttgatgcagataccaa<br>caagattaaaacttcaaacattaagcaagaagcccccaatgcgatggtttcaaagaaaa<br>ggtgcaaaatgggaagataatctcgtttaagaaaagttggaaatctattaagaccaacccccca<br>gaagtagtagaattcaattactatttattgttttcgaaaaattactattctgatgaaaa |
| <i>srh-<br/>142prom<br/>(1,5kb) in<br/>pPD95.75</i> | fwd gagagatctagataactccgaacttgccgcct<br>rev gagagaaccggtattggcaaaaagaaaaaagaggtgc                                                                                                                                                                                                                                                       |

### Primers for site-directed mutagenesis (forward sequences)

| Construct   | Sequence                                                   |
|-------------|------------------------------------------------------------|
| tph-1prom42 | gcagggctcatttattctcttacggaaccatgacagca                     |
| tph-1prom70 | ctgacatcattctcatcttttctatcatcacaagccgtgggctca              |
| tph-1prom71 | gcagggctcatttattctcttacggaaccatgacagca                     |
| cat-4prom69 | gctttctcagctttctaagattacttacggctcattttcaatatcacc           |
| cat-4prom73 | cttattctttttctcatttttcacataatttgaaaagatgatgaagtctatccattcg |
| cat-4prom74 | cttttttctcatttttcatttaagtgggaaaagatgatgaagtctatcc          |
| bas-1prom74 | cctacctcgatctctgtcaatttgggaaatcttttgctccagc                |
| bas-1prom90 | gtatcggaaatgtgctcggggccatagcgaaattatatttctattttcttatt      |
| cat-1prom80 | gtgatgtatagttcctttatataatcattttatgcttcaactgcagtctc         |
| cat-1prom77 | gcaaggggcacgtttagattcccttgtctgaaaaattgattg                 |
| cat-1prom72 | ccaccaaattttcaatgtttccctgccgaaagaaaatatgaaaatatcaacg       |
| cat-1prom90 | ctgagagaaaaatgaaaggaaaatcccagaaatgtgatacaaaaactgagagtc     |
| mod-5prom10 | cctaaccxaaatcaatgaatattcttacgcatgttttctttttcacttc          |
| mod-5prom11 | cccaaataatgaatattcccacgcaaattttcctttttcacttcaa             |

### Primers for CRISPR-Cas9 mediated mNeonGreen knock in

| Amplicon                                        | Sequence                                                                                                                                                 |
|-------------------------------------------------|----------------------------------------------------------------------------------------------------------------------------------------------------------|
| <i>lag-1</i><br>homology<br>arm 5'.<br>External | fwd aataggacaaccggcgatgt<br>rev cagacttctctgcccctcgtaattggacacaattctgcacgg                                                                               |
| <i>lag-1</i><br>homology<br>arm 5'.<br>Nested   | fwd acgttgtaaaacgacggccagtcgccggcacaaccggcgatgttgaggta<br>rev catgtgtcctcctctcccttgagaccattgggccaggattctcctcgacgtcacc<br>gcatgttagcagacttctctgcccctc     |
| <i>lag-1</i><br>homology<br>arm 3'.<br>External | fwd aattactagattggtctctcgcg<br>rev tggaagtccacaaaatccgagata                                                                                              |
| <i>lag-1</i><br>homology<br>arm 3'.<br>Nested   | fwd cgtgattacaaggatgacgatgacaagagatagattggtctctcgcgga<br>rev tcacacaggaacagctatgacatggtatgttccacaaaatccgagatacatcatg                                     |
| <i>lag-1</i><br>sgRNA                           | fwd ctccattgacgagatgtcttgattactagattccactctcggttaagagctatgctgg<br>aaacag<br>rev ctgttccagcatagctcttaaacggagagtggaatctagtaatcaagacatctcg<br>caataggag     |
| <i>tph-1</i><br>homology<br>arm 5'.<br>External | fwd ccatcatgccgatccattttac<br>rev cagacttctctgcccctc caggatgtagtgagagctcc                                                                                |
| <i>tph-1</i><br>homology<br>arm 5'.<br>Nested   | fwd acgttgtaaaacgacggccagtcgccggca gccgatccattttactccagaac<br>rev catgtgtcctcctctcccttgagaccattgggccaggattctcctcgacgtc<br>accgcatgttagcagacttctctgcccctc |

|                                                  |                                                                                                                                                    |
|--------------------------------------------------|----------------------------------------------------------------------------------------------------------------------------------------------------|
| <i>tph -1</i><br>homology<br>arm 3'.<br>External | fwd acatcctgtagtttgagttccg<br>rev tcagctgggacaaagaaagg                                                                                             |
| <i>tph -1</i><br>homology<br>arm 3'.<br>Nested   | fwd cgtgattacaaggatgacgatgacaagaga tagtttgagttccgtg<br>rev tcacacaggaacagctatgacatggtatgacaatcgaagtgtcagttg                                        |
| <i>tph -1</i><br>sgRNA                           | fwd ctctattgtagatgtcttgaacacggaaactcaaactacgtttaagagctat<br>gctggaaacag<br>rev ctgttccagcatagctcttaaacgtagtttgagttccgtgttcaagacatctcgc<br>aataggag |
| <i>mod-5</i><br>homology<br>arm 5'.<br>External  | fwd cagtacacttcaaaggcacac<br>rev tggatctaaaagagaactatcg                                                                                            |
| <i>mod-5</i><br>homology<br>arm 5'.<br>Nested    | fwd acgttgtaaaacgacggccagtcgccggcagctatggcctcgcaacgaaag<br>rev<br>cagacttctctgccctcaactggtgtgagagtggtgattggatctaaaagagaactatcg                     |
| <i>mod-5</i><br>homology<br>arm 3'.<br>External  | fwd ccgctgatcccacacaaattatc<br>rev cgcttctgccgattgttctagc                                                                                          |
| <i>mod-5</i><br>homology<br>arm 3'.<br>Nested    | fwd cgtgattacaaggatgacgatgacaagagatagataattcttggtgactgttg<br>rev tcacacaggaacagctatgacatggtatattgccgctaaatcttctg                                   |
| <i>mod-5</i><br>sgRNA                            | fwdctctattgtagatgtcttgactggagtaagtgtatgaatgttttagagctagaaatag<br>caag<br>revcttgctatttctagctctaaaacattcatacacttactccagtcgaagacatctcgcaatag<br>gag  |

### Primers for ADF specific *lag-1* RNAi

| Amplicon                                   | Sequence                                                          |
|--------------------------------------------|-------------------------------------------------------------------|
| srh-142prom<br>external fwd                | cagttgatccgcttcttcagc                                             |
| srh-142prom<br>internal fwd                | ccaacaatcacttcttcacatcagc                                         |
| srh-142 rev with<br><i>lag-1</i> sense     | ggcgattcgtagaaattatcggtgcaaaaaactatttcgatatgtacaactcata<br>ttggc  |
| srh-142 rev with<br><i>lag-1</i> antisense | cctacaaatcattggaacgacatggcaaaaaactatttcgatatgtacaactcat<br>attggc |
| <i>lag-1</i>                               | fwd cacacgataatttctacgaatcgcc<br>rev ccatgctgtccaatgattgttagg     |

### Primers for ectopic *lag-1* expression cloning in pPD49.78

| Amplicon | Sequence                                                                          |
|----------|-----------------------------------------------------------------------------------|
| lag-1a   | fwd gagagagctagcatgcctctcgctactcaac<br>rev gagagaggtaccctagtaattggacacaattctgcacg |
| lag-1d   | fwd gagagagctagcatgtttctgaggcggtg<br>rev gagagaggtaccctagtaattggacacaattctgcacg   |

### Primers for *lag-1* cell autonomous rescue in ADF

| Amplicon | Sequence                                                                                                                                                   |
|----------|------------------------------------------------------------------------------------------------------------------------------------------------------------|
| srh-142  | fwd acgatggatagcgaacaacttgaaatgaaatccaacaatcactttctcacatcag<br>cagtg<br>rev tctatggtatgtagtatcattcgaaacatacctttggcaaaaaactatttcgatatgtaca<br>actcatattggca |
| lag-1b   | fwd ccaaaggtatgttcgaatgatactaacataacatagaacattttcagatgcctctcg<br>ctactcaacaca<br>rev gtaatgtagcgaccggcgctcagttggctagtaattggacacaattctgcacggtc              |
| lag-1d   | fwd ccaaaggtatgttcgaatgatactaacataacatagaacattttcagatgtttctgga<br>ggcgtggc<br>rev gtaatgtagcgaccggcgctcagttggctagtaattggacacaattctgcacggtc                 |
| lag-1c   | fwd ccaaaggtatgttcgaatgatactaacataacatagaacattttcagatgtccagtcg<br>gtatcgccgc<br>rev gtaatgtagcgaccggcgctcagttggctagtaattggacacaattctgcacggtc               |
| lag-1a   | fwd cgaaatctggataagttatagttccagaagcaatgtccagtcg (mutagenesis)                                                                                              |
